# Supplementary material for: Solar Photocatalytic Activity of Ba-Doped ZnO Nanoparticles: The Role of Surface Hydrophilicity
Source: MDPI journal article supplement (doi:10.3390/nano13202742), 2023-10-10
Supplement: s1 [file s1]

# Solar Photocatalytic Activity of Ba Doped ZnO Nanoparticles: The Role of Surface Hydrophilicity

Abdessalem Hamrouni <sup>1,2</sup>, Marwa Moussa <sup>1</sup>, Nidhal Fessi <sup>1,3</sup>, Leonardo Palmisano <sup>4</sup>, Riccardo Ceccato <sup>5</sup>, Ali Rayes <sup>1,2</sup> and Francesco Parrino <sup>5,\*</sup>

<sup>1</sup> Laboratory of Catalysis and Materials for the Environment and Processes LRCMEP (LR19ES08), Faculty of Sciences of Gabès/University of Gabès, University Campus Erriadh City, Gabès 6072, Tunisia  
hamrouni-28@hotmail.fr (A.H.); moussaamarwaa@gmail.com (M.M.); nidhal\_fessi@hotmail.fr (N.F.); ali.rayes@fsb.rnu.tn (A.R.)

<sup>2</sup> Department of Chemical Engineering-Processes, National Engineering School of Gabès, Omar El Khateb Avenue, Zrig, Gabes 6029, Tunisia

<sup>3</sup> Laboratoire d'Automatique et de Génie des Procédés (LAGEPP), University of Lyon, UMR 5007 CNRS, University Claude Bernard Lyon 1, 69622 Villeurbanne, France

<sup>4</sup> Department of Engineering, University of Palermo, Viale delle Scienze Ed. 6, 90128 Palermo, Italy  
leonardo.palmisano@unipa.it

<sup>5</sup> Department of Industrial Engineering, University of Trento, Via Sommarive 9, 38123 Trento, Italy  
riccardo.ceccato@unitn.it

\* Correspondence: francesco.parrino@unitn.it

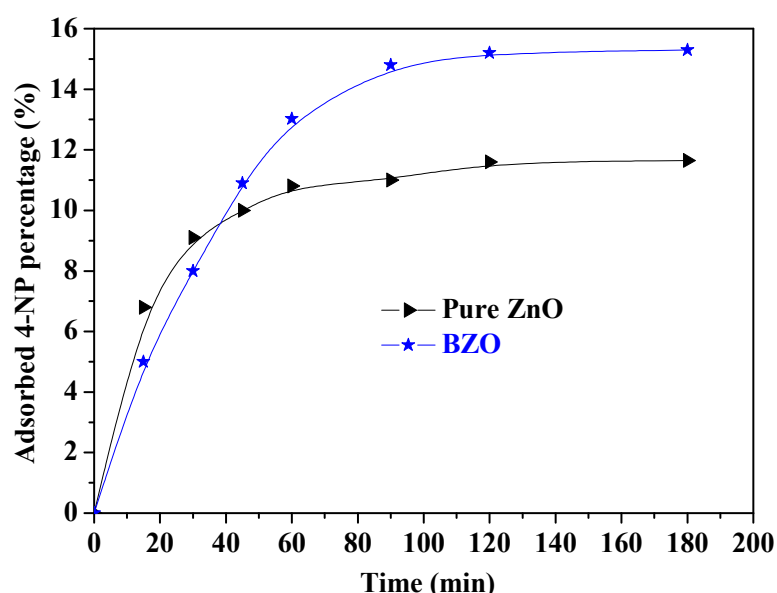

**Figure S1:** 4-NP dark adsorption kinetics using bare ZnO (►) and BZO (★) samples.

Under dark conditions, the adsorbed quantity of 4-NP was not significant for both photocatalysts. About 11 % of the 4-NP was adsorbed in the presence of ZnO while BZO was capable to adsorb 15 %. These percentages are equivalent to adsorbed quantities equal to 28.31 mg·g<sup>-1</sup> and to 39.74 mg·g<sup>-1</sup>, respectively. Notably, the larger SSA of BZO sample (about 14 times larger than ZnO) do not significantly affect the 4-NP adsorption in the dark.
